# Supplementary material for: Epidemiology and Risk Factors of Clostridioides difficile Infections in Germany: A Health Claims Data Analysis
Source: PubMed Central journal article supplement — Infect Dis Ther. 2023 Apr 13;12(5):1299–317. doi: 10.1007/s40121-023-00800-6 (PMC10229516; doi:10.1007/s40121-023-00800-6), 2023-04-13
Supplement: 40121_2023_800_MOESM1_ESM.pdf [file 40121_2023_800_MOESM1_ESM.pdf]

## Electronic Supplementary Material

**Article title:** Epidemiology and Risk Factors of *Clostridioides difficile* Infections in Germany: A Health Claims Data Analysis

**Journal:** *Infectious Diseases and Therapy*

**Authors:** Thomas Weinke<sup>a</sup>, Dominik Beier<sup>b</sup>, Gordon Brestrich<sup>c</sup>, Christof von Eiff<sup>c</sup>, Dennis Häckl<sup>d</sup>, Kirstin Heinrich<sup>e</sup>, Jennifer Moïsi<sup>f</sup>, Katharina Schley<sup>c</sup>

**Affiliations:** <sup>a</sup> Ernst von Bergmann Klinikum, Charlottenstraße 72, 14467 Potsdam, Germany;

<sup>b</sup> InGef – Institute for Applied Health Research Berlin GmbH, Otto-Ostrowski-Str. 5, 10249

Berlin, Germany; <sup>c</sup> Pfizer Pharma GmbH, Linkstr. 10, 10785 Berlin, Germany; <sup>d</sup> WIG2

GmbH, Markt 8, 04109 Leipzig, Germany; <sup>e</sup> Pfizer, Inc., Patient & Health Impact, New York,

NY 10017, USA; <sup>f</sup> Pfizer Vaccines, Medical Development and Scientific/Clinical Affairs,

23 av du Dr Lannelongue 75014 Paris, France

**Corresponding author:** Katharina Schley | Pfizer Pharma GmbH, Linkstr. 10, 10785 Berlin,

Germany | [Katharina.Schley@pfizer.com](mailto:Katharina.Schley@pfizer.com)

**Table S1** CDI incidence rates for females per the main case definition and stratified by age group, 2013–2017

| Age group (in years) | 2013               |                                              |                                                   | 2014               |                                              |                                                   | 2015               |                                              |                                                   | 2016               |                                              |                                                   | 2017               |                                              |                                                   |
|----------------------|--------------------|----------------------------------------------|---------------------------------------------------|--------------------|----------------------------------------------|---------------------------------------------------|--------------------|----------------------------------------------|---------------------------------------------------|--------------------|----------------------------------------------|---------------------------------------------------|--------------------|----------------------------------------------|---------------------------------------------------|
|                      | Incident CDI cases | Total person–time under risk (person-years-) | Incidence rate per 100,000 persons-years (95% CI) | Incident CDI cases | Total person–time under risk (person-years-) | Incidence rate per 100,000 persons-years (95% CI) | Incident CDI cases | Total person–time under risk (person-years-) | Incidence rate per 100,000 persons-years (95% CI) | Incident CDI cases | Total person–time under risk (person-years-) | Incidence rate per 100,000 persons-years (95% CI) | Incident CDI cases | Total person–time under risk (person-years-) | Incidence rate per 100,000 persons-years (95% CI) |
| Overall (18–≥85)     | 2,414              | 1,631,821                                    | 148 (142–154)                                     | 2,366              | 1,638,768                                    | 144 (139–150)                                     | 2,392              | 1,645,910                                    | 145 (140–151)                                     | 2,168              | 1,650,783                                    | 131 (126–137)                                     | 2,020              | 1,646,879                                    | 123 (117–128)                                     |
| 18–<50               | 111                | 766,605                                      | 14 (12–17)                                        | 147                | 755,943                                      | 19 (16–23)                                        | 130                | 748,236                                      | 17 (15–21)                                        | 128                | 740,536                                      | 17 (14–21)                                        | 105                | 726,183                                      | 14 (12–18)                                        |
| 50–59                | 130                | 297,263                                      | 44 (37–52)                                        | 137                | 304,127                                      | 45 (38–53)                                        | 139                | 309,569                                      | 45 (38–53)                                        | 134                | 312,314                                      | 43 (36–51)                                        | 125                | 315,257                                      | 40 (33–47)                                        |
| 60–64                | 96                 | 136,625                                      | 70 (57–86)                                        | 119                | 136,742                                      | 87 (72–104)                                       | 115                | 134,744                                      | 85 (70–102)                                       | 97                 | 133,075                                      | 73 (59–89)                                        | 76                 | 131,933                                      | 58 (45–72)                                        |
| 65–69                | 142                | 101,331                                      | 140 (118–165)                                     | 121                | 106,001                                      | 114 (95–136)                                      | 137                | 113,798                                      | 120 (101–142)                                     | 157                | 125,187                                      | 125 (107–147)                                     | 145                | 130,366                                      | 111 (94–131)                                      |
| 70–74                | 231                | 116,796                                      | 198 (173–225)                                     | 260                | 113,911                                      | 228 (201–258)                                     | 227                | 107,949                                      | 210 (184–239)                                     | 224                | 99,276                                       | 226 (197–257)                                     | 184                | 96,184                                       | 191 (165–221)                                     |
| 75–79                | 407                | 94,449                                       | 431 (390–475)                                     | 432                | 100,913                                      | 428 (389–470)                                     | 449                | 105,556                                      | 425 (387–467)                                     | 357                | 108,085                                      | 330 (297–366)                                     | 334                | 109,448                                      | 305 (273–340)                                     |
| 80–84                | 547                | 63,114                                       | 867 (796–942)                                     | 482                | 63,065                                       | 764 (698–836)                                     | 482                | 66,079                                       | 729 (666–798)                                     | 442                | 69,513                                       | 636 (578–698)                                     | 434                | 73,756                                       | 588 (534–646)                                     |
| ≥85                  | 750                | 55,638                                       | 1,348 (1,253–1,448)                               | 668                | 58,066                                       | 1,150 (1,065–1,241)                               | 713                | 59,978                                       | 1,189 (1,103–1,279)                               | 629                | 62,796                                       | 1,002 (925–1,083)                                 | 617                | 63,752                                       | 968 (893–1,047)                                   |
| ≥65                  | 2,077              | 431,328                                      | 482 (461–503)                                     | 1,963              | 441,957                                      | 444 (425–464)                                     | 2,008              | 453,360                                      | 443 (424–463)                                     | 1,809              | 464,858                                      | 389 (371–408)                                     | 1,714              | 473,506                                      | 362 (345–380)                                     |
| ≥70                  | 1,935              | 329,996                                      | 586 (561–613)                                     | 1,842              | 335,956                                      | 548 (524–574)                                     | 1,871              | 339,562                                      | 551 (526–577)                                     | 1,652              | 339,671                                      | 486 (463–510)                                     | 1,569              | 343,140                                      | 457 (435–480)                                     |
| ≥75                  | 1,704              | 213,201                                      | 799 (762–838)                                     | 1,582              | 222,045                                      | 712 (678–748)                                     | 1,644              | 231,612                                      | 710 (676–745)                                     | 1,428              | 240,394                                      | 594 (564–626)                                     | 1,385              | 246,956                                      | 561 (532–591)                                     |

CDI *Clostridioides difficile* infection, CI confidence interval

**Table S2** CDI incidence rates for males per the main case definition and stratified by age group 2013–2017

| Age group (in years) | 2013               |                                              |                                                   | 2014               |                                              |                                                   | 2015               |                                              |                                                   | 2016               |                                              |                                                   | 2017               |                                              |                                                   |
|----------------------|--------------------|----------------------------------------------|---------------------------------------------------|--------------------|----------------------------------------------|---------------------------------------------------|--------------------|----------------------------------------------|---------------------------------------------------|--------------------|----------------------------------------------|---------------------------------------------------|--------------------|----------------------------------------------|---------------------------------------------------|
|                      | Incident CDI cases | Total person–time under risk (person-years-) | Incidence rate per 100,000 persons-years (95% CI) | Incident CDI cases | Total person–time under risk (person-years-) | Incidence rate per 100,000 persons-years (95% CI) | Incident CDI cases | Total person–time under risk (person-years-) | Incidence rate per 100,000 persons-years (95% CI) | Incident CDI cases | Total person–time under risk (person-years-) | Incidence rate per 100,000 persons-years (95% CI) | Incident CDI cases | Total person–time under risk (person-years-) | Incidence rate per 100,000 persons-years (95% CI) |
| Overall (18–≥85)     | 2,095              | 1,559,662                                    | 134 (129–140)                                     | 2,001              | 1,566,186                                    | 128 (122–133)                                     | 2,162              | 1,577,562                                    | 137 (131–143)                                     | 1,826              | 1,585,510                                    | 115 (110–121)                                     | 1,839              | 1,578,328                                    | 117 (111–122)                                     |
| 18–<50               | 107                | 784,468                                      | 14 (11–16)                                        | 100                | 777,049                                      | 13 (10–16)                                        | 110                | 775,095                                      | 14 (12–17)                                        | 92                 | 771,891                                      | 12 (10–15)                                        | 92                 | 756,296                                      | 12 (10–15)                                        |
| 50–59                | 133                | 296,752                                      | 45 (38–53)                                        | 146                | 303,721                                      | 48 (41–57)                                        | 137                | 311,009                                      | 44 (37–52)                                        | 136                | 315,191                                      | 43 (36–51)                                        | 161                | 318,816                                      | 50 (43–59)                                        |
| 60–64                | 98                 | 120,686                                      | 81 (66–99)                                        | 118                | 121,629                                      | 97 (80–116)                                       | 150                | 122,711                                      | 122 (103–143)                                     | 120                | 124,339                                      | 97 (80–115)                                       | 130                | 125,720                                      | 103 (86–123)                                      |
| 65–69                | 158                | 94,253                                       | 168 (143–196)                                     | 149                | 94,368                                       | 158 (134–185)                                     | 178                | 97,273                                       | 183 (157–212)                                     | 162                | 105,461                                      | 154 (131–179)                                     | 152                | 108,511                                      | 140 (119–164)                                     |
| 70–74                | 334                | 111,341                                      | 300 (269–334)                                     | 335                | 107,974                                      | 310 (278–345)                                     | 310                | 100,387                                      | 309 (275–345)                                     | 232                | 89,783                                       | 258 (226–294)                                     | 208                | 84,103                                       | 247 (215–283)                                     |
| 75–79                | 420                | 80,811                                       | 520 (471–571)                                     | 406                | 87,130                                       | 466 (422–514)                                     | 458                | 91,954                                       | 498 (453–546)                                     | 383                | 94,199                                       | 407 (367–449)                                     | 370                | 95,346                                       | 388 (350–430)                                     |
| 80–84                | 449                | 44,602                                       | 1,007 (916–1,104)                                 | 378                | 45,225                                       | 836 (754–924)                                     | 415                | 48,233                                       | 860 (780–947)                                     | 364                | 51,784                                       | 703 (633–779)                                     | 371                | 55,566                                       | 668 (601–739)                                     |
| ≥85                  | 396                | 26,749                                       | 1,480 (1,338–1,634)                               | 369                | 29,090                                       | 1,268 (1,142–1,405)                               | 404                | 30,899                                       | 1,307 (1,183–1,441)                               | 337                | 32,863                                       | 1,025 (919–1,141)                                 | 355                | 33,970                                       | 1,045 (939–1,160)                                 |
| ≥65                  | 1,757              | 357,755                                      | 491 (468–515)                                     | 1,637              | 363,787                                      | 450 (428–472)                                     | 1,765              | 368,747                                      | 479 (457–502)                                     | 1,478              | 374,090                                      | 395 (375–416)                                     | 1,456              | 377,496                                      | 386 (366–406)                                     |
| ≥70                  | 1,599              | 263,502                                      | 607 (577–637)                                     | 1,488              | 269,419                                      | 552 (525–581)                                     | 1,587              | 271,473                                      | 585 (556–614)                                     | 1,316              | 268,629                                      | 490 (464–517)                                     | 1,304              | 268,985                                      | 485 (459–512)                                     |
| ≥75                  | 1,265              | 152,161                                      | 831 (786–878)                                     | 1,153              | 161,444                                      | 714 (674–757)                                     | 1,277              | 171,087                                      | 746 (706–788)                                     | 1,084              | 178,846                                      | 606 (571–643)                                     | 1,096              | 184,881                                      | 593 (558–629)                                     |

CDI *Clostridioides difficile* infection, CI confidence interval

**Table S3** Annual cumulative incidence of CDI stratified by CDI case definition, 2013–2017

| Study year | Fully insured persons <sup>a</sup><br>N | Main case definition       |                                                         | Broad case definition      |                                                         | Strict case definition     |                                                         |
|------------|-----------------------------------------|----------------------------|---------------------------------------------------------|----------------------------|---------------------------------------------------------|----------------------------|---------------------------------------------------------|
|            |                                         | Incident CDI patients<br>n | Incident CDI patients per<br>100,000 persons<br>(95%CI) | Incident CDI patients<br>n | Incident CDI patients per<br>100,000 persons<br>(95%CI) | Incident CDI patients<br>n | Incident CDI patients per<br>100,000 persons<br>(95%CI) |
| 2013       | 3,256,861                               | 4,289                      | 132 (128–136)                                           | 5,660                      | 174 (169–178)                                           | 4,278                      | 131 (127–135)                                           |
| 2014       | 3,265,477                               | 4,127                      | 126 (123–130)                                           | 5,622                      | 172 (168–177)                                           | 4,123                      | 126 (122–130)                                           |
| 2015       | 3,290,465                               | 4,295                      | 131 (127–134)                                           | 5,894                      | 179 (175–184)                                           | 4,289                      | 130 (126–134)                                           |
| 2016       | 3,329,496                               | 3,766                      | 113 (110–117)                                           | 5,119                      | 154 (150–158)                                           | 3,761                      | 113 (109–117)                                           |
| 2017       | 3,298,162                               | 3,630                      | 110 (107–114)                                           | 4,928                      | 149 (145–154)                                           | 3,625                      | 110 (106–114)                                           |

CDI *Clostridioides difficile* infection, CI confidence interval

<sup>a</sup> Based on insured persons  $\geq 18$  years old with continuous insurance in the previous year and at least one day insurance in the first quarter of the respective year

**Table S4** Cumulative CDI incidence for females per the main case definition and stratified by age group, 2013–2017

| Age group (in years) | 2013                  |                                    |                                                    | 2014                  |                                    |                                                    | 2015                  |                                    |                                                    | 2016                  |                                    |                                                    | 2017                  |                                    |                                                    |
|----------------------|-----------------------|------------------------------------|----------------------------------------------------|-----------------------|------------------------------------|----------------------------------------------------|-----------------------|------------------------------------|----------------------------------------------------|-----------------------|------------------------------------|----------------------------------------------------|-----------------------|------------------------------------|----------------------------------------------------|
|                      | Incident CDI patients | Fully insured persons <sup>a</sup> | Incident CDI patients per 100,000 persons (95% CI) | Incident CDI patients | Fully insured persons <sup>a</sup> | Incident CDI patients per 100,000 persons (95% CI) | Incident CDI patients | Fully insured persons <sup>a</sup> | Incident CDI patients per 100,000 persons (95% CI) | Incident CDI patients | Fully insured persons <sup>a</sup> | Incident CDI patients per 100,000 persons (95% CI) | Incident CDI patients | Fully insured persons <sup>a</sup> | Incident CDI patients per 100,000 persons (95% CI) |
| Overall (18–≥85)     | 2,306                 | 1,665,075                          | 138 (133–144)                                      | 2,243                 | 1,669,798                          | 134 (129–140)                                      | 2,261                 | 1,680,326                          | 135 (129–140)                                      | 2,039                 | 1,694,468                          | 120 (115–126)                                      | 1,898                 | 1,682,324                          | 113 (108–118)                                      |
| 18–<50               | 109                   | 783,339                            | 14 (11–17)                                         | 142                   | 771,818                            | 18 (15–22)                                         | 127                   | 764,859                            | 17 (14–20)                                         | 119                   | 764,516                            | 16 (13–19)                                         | 100                   | 743,719                            | 13 (11–16)                                         |
| 50–59                | 125                   | 301,060                            | 42 (35–49)                                         | 126                   | 307,854                            | 41 (34–49)                                         | 130                   | 314,631                            | 41 (35–49)                                         | 130                   | 319,479                            | 41 (34–48)                                         | 121                   | 320,158                            | 38 (31–45)                                         |
| 60–64                | 94                    | 138,313                            | 68 (55–83)                                         | 112                   | 138,223                            | 81 (67–97)                                         | 104                   | 136,350                            | 76 (62–92)                                         | 94                    | 135,446                            | 69 (56–85)                                         | 69                    | 133,579                            | 52 (40–65)                                         |
| 65–69                | 130                   | 102,353                            | 127 (106–151)                                      | 113                   | 106,906                            | 106 (87–127)                                       | 128                   | 114,886                            | 111 (93–132)                                       | 142                   | 126,580                            | 112 (94–132)                                       | 136                   | 131,541                            | 103 (87–122)                                       |
| 70–74                | 221                   | 118,060                            | 187 (163–214)                                      | 250                   | 115,054                            | 217 (191–246)                                      | 216                   | 109,184                            | 198 (172–226)                                      | 206                   | 100,364                            | 205 (178–235)                                      | 176                   | 97,249                             | 181 (155–210)                                      |
| 75–79                | 385                   | 96,162                             | 400 (361–442)                                      | 406                   | 102,495                            | 396 (359–437)                                      | 415                   | 107,174                            | 387 (351–426)                                      | 332                   | 109,551                            | 303 (271–337)                                      | 315                   | 111,129                            | 283 (253–317)                                      |
| 80–84                | 519                   | 65,236                             | 796 (729–867)                                      | 456                   | 64,963                             | 702 (639–769)                                      | 454                   | 68,072                             | 667 (607–731)                                      | 409                   | 71,282                             | 574 (520–632)                                      | 403                   | 75,908                             | 531 (480–585)                                      |
| ≥85                  | 723                   | 60,552                             | 1,194 (1,109–1,284)                                | 638                   | 62,485                             | 1,021 (943–1,103)                                  | 687                   | 65,170                             | 1,054 (977–1,136)                                  | 607                   | 67,250                             | 903 (832–977)                                      | 578                   | 69,041                             | 837 (770–908)                                      |
| ≥65                  | 1,978                 | 442,363                            | 447 (428–467)                                      | 1,863                 | 451,903                            | 412 (394–431)                                      | 1,900                 | 464,486                            | 409 (391–428)                                      | 1,696                 | 475,027                            | 357 (340–374)                                      | 1,608                 | 484,868                            | 332 (316–348)                                      |
| ≥70                  | 1,848                 | 340,010                            | 544 (519–569)                                      | 1,750                 | 344,997                            | 507 (484–532)                                      | 1,772                 | 349,600                            | 507 (484–531)                                      | 1,554                 | 348,447                            | 446 (424–469)                                      | 1,472                 | 353,327                            | 417 (396–438)                                      |
| ≥75                  | 1,627                 | 221,950                            | 733 (698–770)                                      | 1,500                 | 229,943                            | 652 (620–686)                                      | 1,556                 | 240,416                            | 647 (615–680)                                      | 1,348                 | 248,083                            | 543 (515–573)                                      | 1,296                 | 256,078                            | 506 (479–534)                                      |

*CDI Clostridioides difficile* infection, *CI* confidence interval

<sup>a</sup> Based on insured females ≥18 years old with continuous insurance in the previous year and at least one day insurance in the first quarter of the respective year

**Table S5** Cumulative CDI incidence for males per the main case definition and stratified by age group, 2013–2017

| Age group (in years) | 2013                  |                                    |                                                    | 2014                  |                                    |                                                    | 2015                  |                                    |                                                    | 2016                  |                                    |                                                    | 2017                  |                                    |                                                    |
|----------------------|-----------------------|------------------------------------|----------------------------------------------------|-----------------------|------------------------------------|----------------------------------------------------|-----------------------|------------------------------------|----------------------------------------------------|-----------------------|------------------------------------|----------------------------------------------------|-----------------------|------------------------------------|----------------------------------------------------|
|                      | Incident CDI patients | Fully insured persons <sup>a</sup> | Incident CDI patients per 100,000 persons (95% CI) | Incident CDI patients | Fully insured persons <sup>a</sup> | Incident CDI patients per 100,000 persons (95% CI) | Incident CDI patients | Fully insured persons <sup>a</sup> | Incident CDI patients per 100,000 persons (95% CI) | Incident CDI patients | Fully insured persons <sup>a</sup> | Incident CDI patients per 100,000 persons (95% CI) | Incident CDI patients | Fully insured persons <sup>a</sup> | Incident CDI patients per 100,000 persons (95% CI) |
| Overall (18–≥85)     | 1,983                 | 1,591,786                          | 125 (119–130)                                      | 1,884                 | 1,595,679                          | 118 (113–124)                                      | 2,034                 | 1,610,139                          | 126 (121–132)                                      | 1,727                 | 1,635,028                          | 106 (101–111)                                      | 1,732                 | 1,615,838                          | 107 (102–112)                                      |
| 18–<50               | 101                   | 800,539                            | 13 (10–15)                                         | 94                    | 791,606                            | 12 (10–15)                                         | 106                   | 789,464                            | 13 (11–16)                                         | 87                    | 800,031                            | 11 (9–13)                                          | 88                    | 775,531                            | 11 (9–14)                                          |
| 50–59                | 126                   | 301,302                            | 42 (35–50)                                         | 141                   | 307,378                            | 46 (39–54)                                         | 132                   | 316,202                            | 42 (35–50)                                         | 129                   | 322,835                            | 40 (33–47)                                         | 145                   | 323,731                            | 45 (38–53)                                         |
| 60–64                | 95                    | 122,428                            | 78 (63–95)                                         | 112                   | 123,298                            | 91 (75–109)                                        | 138                   | 124,636                            | 111 (93–131)                                       | 110                   | 126,941                            | 87 (71–104)                                        | 123                   | 127,623                            | 96 (80–115)                                        |
| 65–69                | 150                   | 95,452                             | 157 (133–184)                                      | 140                   | 95,596                             | 146 (123–173)                                      | 168                   | 98,779                             | 170 (145–198)                                      | 154                   | 107,507                            | 143 (122–168)                                      | 147                   | 110,229                            | 133 (113–157)                                      |
| 70–74                | 311                   | 113,167                            | 275 (245–307)                                      | 311                   | 109,787                            | 283 (253–317)                                      | 291                   | 102,333                            | 284 (253–319)                                      | 216                   | 91,609                             | 236 (205–269)                                      | 193                   | 85,716                             | 225 (195–259)                                      |
| 75–79                | 396                   | 82,893                             | 478 (432–527)                                      | 385                   | 89,225                             | 431 (389–477)                                      | 423                   | 94,394                             | 448 (406–493)                                      | 359                   | 96,619                             | 372 (334–412)                                      | 345                   | 97,810                             | 353 (316–392)                                      |
| 80–84                | 423                   | 46,682                             | 906 (822–997)                                      | 353                   | 47,165                             | 748 (672–831)                                      | 386                   | 50,425                             | 765 (691–846)                                      | 348                   | 53,863                             | 646 (580–718)                                      | 348                   | 57,938                             | 601 (539–667)                                      |
| ≥85                  | 381                   | 29,323                             | 1,299 (1,172–1,437)                                | 348                   | 31,624                             | 1,100 (988–1,222)                                  | 390                   | 33,906                             | 1,150 (1,039–1,270)                                | 324                   | 35,623                             | 910 (813–1,014)                                    | 343                   | 37,260                             | 921 (826–1,023)                                    |
| ≥65                  | 1,661                 | 367,517                            | 452 (430–474)                                      | 1,537                 | 373,397                            | 412 (391–433)                                      | 1,658                 | 379,837                            | 437 (416–458)                                      | 1,401                 | 385,221                            | 364 (345–383)                                      | 1,376                 | 388,953                            | 354 (335–373)                                      |
| ≥70                  | 1,511                 | 272,065                            | 555 (528–584)                                      | 1,397                 | 277,801                            | 503 (477–530)                                      | 1,490                 | 281,058                            | 530 (504–558)                                      | 1,247                 | 277,714                            | 449 (424–475)                                      | 1,229                 | 278,724                            | 441 (417–466)                                      |
| ≥75                  | 1,200                 | 158,898                            | 755 (713–799)                                      | 1,086                 | 168,014                            | 646 (608–686)                                      | 1,199                 | 178,725                            | 671 (633–710)                                      | 1,031                 | 186,105                            | 554 (521–589)                                      | 1,036                 | 193,008                            | 537 (505–570)                                      |

*CDI Clostridioides difficile* infection, *CI* confidence interval

<sup>a</sup> Based on insured males ≥18 years old with continuous insurance in the previous year and at least one day insurance in the first quarter of the respective year
